# Supplementary material for: The Role of Ascorbate–Glutathione System and Volatiles Emitted by Insect-Damaged Lettuce Roots as Navigation Signals for Insect and Slug Parasitic Nematodes
Source: MDPI journal article supplement (doi:10.3390/insects14060559), 2023-06-15
Supplement: s1 [file s1]

**Table S1.** Dynamics of the concentration of the main antioxidants and pigment molecules together with the percentage increase/decrease in roots and leaves of plants attacked by wireworms compared to unattacked plants. Different letters (a-b) indicate statistically differences ( $p < 0.05$ ) between the control and infested plants.

|                                         | root<br>control | root<br>wireworm | % increase/<br>decrease | leaves<br>control | leaves<br>wireworm | % increase/<br>decrease |
|-----------------------------------------|-----------------|------------------|-------------------------|-------------------|--------------------|-------------------------|
| <b>total glutathione</b><br>(nmol/g DW) | 259.9 b         | 290.8 b          | 12                      | 2276.8 a          | 2413.2 a           | 6                       |
| % GSSG                                  | 19.3 b          | 25.1 a           | 31                      | 6.4 b             | 6.2 b              | -                       |
| <b>total ascorbate</b><br>(nmol/g DW)   | 3937.6 d        | 4833.9 c         | 23                      | 10660.1 b         | 11794.0 a          | 11                      |
| % DHA                                   | 22.6 b          | 24.1 b           | 7                       | 54.2 a            | 47.4 a             | -13                     |
| <b>violaxanthin</b><br>(mg/g DW)        | /               | /                | /                       | 139.0 a           | 124.4 b            | -11                     |
| <b>antheraxanthin</b><br>(mg/g DW)      | /               | /                | /                       | 124.4 a           | 127.2 a            | -                       |
| <b>zeaxanthin</b><br>(mg/g DW)          | /               | /                | /                       | 16 b              | 19.3 a             | 21                      |
| <b>chl a+b</b><br>(mg/g DW)             | /               | /                | /                       | 3198.6 a          | 2593.7 b           | -19                     |
| <b>chl a/b</b>                          | /               | /                | /                       | 4.8 a             | 4.4 a              | -8                      |

**Table S2.** Results of SPME-GC-MS analysis of volatile organic compounds (VOC) emitted by -aerial parts (AP) and roots (R) of lettuce plants non-attacked (C- control) and attacked by wireworms (W).

| VOC                                                     | CAS number | Occurrence | C  | W  |
|---------------------------------------------------------|------------|------------|----|----|
| Naphtalene                                              | 91-20-3    | R          | ++ | +  |
| 2,4-nonadienal                                          | 6750-03-4  | R          | +  | ++ |
| 1,3-bis(1,1-dimethylethyl)-benzene                      | 1014-60-4  | AP, R      | ++ | +  |
| n-Decanoic acid                                         | 334-48-5   | R          | -  | +  |
| Caryophyllene                                           | 87-44-5    | AP         | +  | -  |
| trans- $\beta$ -Ionone                                  | 79-77-6    | AP         | +  | ++ |
| 3,7,7-trimethyl-spiro[5.5]undec-2-ene                   | 18431-82-8 | AP         | ++ | +  |
| Caryophyllene oxide                                     | 1139-30-6  | AP         | +  | -  |
| 2,6-bis(1,1-dimethylethyl)-2,5-cyclohexadiene-1,4-dione | 719-22-2   | R          | +  | -  |
| Hexadecane                                              | 544-76-3   | R          | ++ | +  |
| 4-(hydroxyacetyl)-1,1'-biphenyl                         | 37166-61-3 | R          | +  | ++ |
| 1,2-Benzenedicarboxylic acid, bis(2-methylpropyl) ester | 84-69-5    | AP         | +  | ++ |
| Dibutyl phthalate                                       | 84-74-2    | R          | ++ | +  |
| 1-Docosanol acetate                                     | 822-26-4   | AP         | +  | -  |
| Bis(2-ethylhexyl) phthalate                             | 117-81-7   | AP, R      | ++ | +  |

+ = VOC is present; - = VOC is not present; ++ = level of VOC is increased compared to the other group
